# Supplementary material for: Worldwide Evaluation of CAMS-EGG4 CO2 Data Re-Analysis at the Surface Level
Source: MDPI journal article supplement (doi:10.3390/toxics10060331), 2022-06-17
Supplement: s1 [file s1]

# Supplementary Materials: Worldwide Evaluation of CAMS-EGG4 CO<sub>2</sub> Data Re-Analysis at the Surface Level

Danilo Custódio, Carlos Borrego and Hélder Relvas

**Table S1.** Location, root-mean-squares error (RMSE), percentile (%) differences, mean bias (MB), and the slope of the regression between observation and CAMS-EGG4 at the studied stations. \* The number subscripted on the acronym of the station refer to the height (m agl) of the observation in tower stations.

| Station             | Site                                                 | latitude | longitude | RMSE  | % difference | MB     | slope |
|---------------------|------------------------------------------------------|----------|-----------|-------|--------------|--------|-------|
| ALT                 | Alert (ALT, Canada)                                  | 82.49915 | −62.3415  | 2.21  | 0.47         | −0.57  | 0.999 |
| AMS                 | Amsterdam Island (AMS, France)                       | −37.7983 | 77.5378   | 1.68  | 0.41         | 1.58   | 1.004 |
| ATTO <sub>10m</sub> | Amazon Tall Tower Observatory (ATTO 10 m, Brazil)    | −2.1441  | −58.9999  | 74.30 | 12.30        | 44.53  | 1.12  |
| ATTO <sub>34m</sub> | Amazon Tall Tower Observatory (ATTO 34 m, Brazil)    | −2.1441  | −58.9999  | 33.01 | 5.63         | 17.39  | 1.04  |
| ATTO <sub>71m</sub> | Amazon Tall Tower Observatory (ATTO 71 m, Brazil)    | −2.1441  | −58.9999  | 55.46 | 8.36         | 3.83   | 1.01  |
| AZR                 | Serreta (AZR, Terceira - Azores)                     | 38.77    | −27.38    | 1.85  | 0.40         | −0.33  | 0.999 |
| AMY                 | Anmyeon-do (AMY, Republic of Korea)                  | 36.5386  | 126.33    | 35.20 | 4.94         | 19.16  | 1.045 |
| BEO                 | BEO Moussala (BEO, Bulgaria)                         | 42.1792  | 23.5856   | 50.56 |              | 63.11  | 1.164 |
| BHD                 | Baring Head (BHD, New Zealand)                       | −41.4082 | 174.8708  | 10.31 | 1.76         | −6.24  | 0.985 |
| BKT                 | Bukit Kototabang (BKT, Indonesia)                    | −0.20194 | 100.3181  | 52.71 | 9.72         | 30.69  | 1.074 |
| BRW                 | Barrow (BRW, Alaska)                                 | 71.32301 | −156.611  | 2.77  | 0.54         | 1.22   | 1.003 |
| CDL                 | Candle Lake (CDL, Canada)                            | 53.98711 | −105.118  | 5.81  | 1.09         | 2.59   | 1.007 |
| CGO                 | Cape Grim (CGO, Australia)                           | −40.6822 | 144.6883  | 4.86  | 0.78         | 1.10   | 1.003 |
| CGR                 | Capo Granitola (CDR, Italy)                          | 37.57111 | 12.65972  | 8.30  | 1.35         | −2.46  | 0.994 |
| CLH                 | Churchill (CLH, Canada)                              | 58.7379  | −93.8206  | 3.89  | 0.63         | 1.97   | 1.005 |
| CMN                 | Monte Cimone (CMN, Italy)                            | 44.16667 | 10.68333  | 33.31 | 6.22         | 24.28  | 1.061 |
| CPA                 | Cholpon-Ata (CPA, Kyrgyzstan)                        | 42.63694 | 77.0675   | 13.35 | 2.12         | 5.17   | 1.012 |
| CPT                 | Cape Point (CPT, South Africa)                       | −34.3535 | 18.48968  | 3.86  | 0.61         | 1.64   | 1.004 |
| CUR                 | Monte Curcio (CUR, Italy)                            | 39.31597 | 16.42325  | 13.02 | 3.03         | 11.89  | 1.029 |
| CVO                 | Cape Verde (CVO)                                     | 16.86403 | −24.8675  | 1.67  | 0.33         | 0.01   | 1.000 |
| DDR                 | Mt. Dodaira (DDR, Japan)                             | 36       | 139.18    | 65.72 | 11.48        | 44.79  | 1.111 |
| DEU                 | Deuselbach (DEU, Germany)                            | 49.76667 | 7.05      | 22.86 | 3.46         | 11.41  | 1.029 |
| DIG                 | Diabla Gora (DIG, Poland)                            | 54.15    | 22.06667  | 21.91 | 3.66         | −7.93  | 0.978 |
| DMV                 | Danum Valley (DMV, Malaysia)                         | 4.981389 | 117.8436  | 75.24 | 14.41        | 50.67  | 1.129 |
| ECO                 | Lecce Environmental-Climate Observatory (ECO, Italy) | 40.3358  | 18.1245   | 28.47 | 3.52         | −12.56 | 0.967 |
| EGB                 | Egbert (EGB, Canada)                                 | 44.23101 | −79.7838  | 8.15  | 1.16         | 0.32   | 1.001 |
| ESP                 | Estevan Point (SEP, Canada)                          | 49.38294 | −126.544  | 5.53  | 0.91         | −0.22  | 0.999 |
| ETL                 | East Trout Lake (ETL, Canada)                        | 54.35374 | −104.987  | 2.51  | 0.43         | −0.28  | 0.999 |

|            |                                      |          |          |       |       |        |       |
|------------|--------------------------------------|----------|----------|-------|-------|--------|-------|
| <b>FDT</b> | Fundata (FDT, Romania)               | 45.43147 | 25.27154 | 33.30 | 7.88  | 28.06  | 1.077 |
| <b>FRF</b> | Farafra (FRF, Egypt)                 | 27.05812 | 27.99016 | 49.95 | 11.47 | 36.06  | 1.088 |
| <b>FSD</b> | Fraserdale (FSD, Canada)             | 49.87517 | −81.5698 | 6.33  | 0.84  | −1.05  | 0.997 |
| <b>GAT</b> | Gartow (GAT, Germany)                | 53.06551 | 11.44273 | 8.05  | 1.17  | 2.77   | 1.007 |
| <b>GLH</b> | Giordan Lighthouse (GLH, Malta)      | 36.0722  | 14.2184  | 15.13 | 3.63  | 14.18  | 1.036 |
| <b>GSN</b> | Gosan (GSN, Republic of Korea)       | 33.29382 | 126.1628 | 7.13  | 1.35  | −0.03  | 0.99  |
| <b>HPB</b> | Hohenpeissenberg (HPB, Germany)      | 47.8015  | 11.00962 | 15.50 | 2.19  | 6.45   | 1.016 |
| <b>IZO</b> | Izaña (IZO, Tenerife)                | 28.309   | −16.4994 | 3.01  | 0.61  | 1.90   | 1.005 |
| <b>JBN</b> | Jubany (JBN, Argentina)              | −62.2382 | −58.666  | 1.60  | 0.33  | 0.84   | 1.002 |
| <b>JFJ</b> | Jungfrauoch (JFJ, Switzerland)       | 46.54749 | 7.98509  | 23.13 | 4.18  | 15.42  | 1.040 |
| <b>JGS</b> | Jeju Gosan (JFJ, Republic of Korea)  | 33.30005 | 126.2057 | 12.57 | 2.78  | 10.68  | 1.027 |
| <b>KIS</b> | Kisai (KIS, Japan)                   | 36.08    | 139.55   | 56.21 | 9.69  | 28.82  | 1.067 |
| <b>KIT</b> | Karlsruhe (KIT, Germany)             | 49.1     | 8.438    | 21.08 | 2.98  | 5.44   | 1.013 |
| <b>KMW</b> | Kollumerwaard (KMW, Netherlands)     | 53.33333 | 6.266667 | 25.08 | 3.82  | −13.47 | 0.964 |
| <b>KSG</b> | King Sejong (KSG, Republic of Korea) | −62.2167 | −58.7833 | 1.64  | 0.40  | 1.50   | 1.004 |
| <b>LIN</b> | Lindenberg (LIN, Germany)            | 52.21667 | 14.11667 | 9.62  | 1.34  | 3.46   | 1.008 |
| <b>LLB</b> | Lac La Biche (LLB, Canada)           | 54.95381 | −112.467 | 6.36  | 0.98  | −2.61  | 0.994 |
| <b>LMP</b> | Lampedusa (LMP, Italy)               | 35.5182  | 12.6305  | 1.81  | 0.36  | −1.24  | 0.997 |
| <b>LMT</b> | Lamezia Terme (LMT, Italy)           | 38.8763  | 16.2322  | 23.60 | 3.10  | −12.27 | 0.968 |
| <b>MEX</b> | Mexico, (MEX)                        | 18.9841  | −97.311  | 12.03 | 1.90  | 8.14   | 1.02  |
| <b>MHD</b> | Mace Head (MHD, Ireland)             | 53.32661 | −9.90442 | 4.01  | 0.74  | 0.66   | 1.002 |
| <b>MKW</b> | Mikawa-Ichinomiya (MKW, Japan)       | 34.85    | 137.43   | 39.89 | 7.22  | 19.73  | 1.048 |
| <b>MLO</b> | Mauna Loa (MLO, USA)                 | 19.53623 | −155.576 | 2.89  | 0.62  | 2.23   | 1.006 |
| <b>MNM</b> | Minamitorishima (MNM, Japan)         | 24.2883  | 153.9833 | 1.86  | 0.39  | 0.97   | 1.002 |
| <b>MQA</b> | Macquarie Island (MQA, Australia)    | −54.4985 | 158.9385 | 1.42  | 0.33  | −1.34  | 0.997 |
| <b>NGL</b> | Neuglobsow (NGL, Germany)            | 53.14278 | 13.03333 | 15.36 | 2.18  | −6.38  | 0.983 |
| <b>PAL</b> | Pallas (PAL, Finland)                | 67.97361 | 24.11583 | 6.35  | 1.18  | 2.53   | 1.006 |
| <b>PDI</b> | Pha Din (PDI, Viet Nam)              | 21.5731  | 103.5157 | 49.19 | 8.40  | 13.28  | 1.032 |
| <b>PRS</b> | Plateau Rosa (PRS, Italy)            | 45.93534 | 7.70731  | 22.39 | 4.24  | 16.28  | 1.041 |
| <b>PUY</b> | Puy de Dôme (PUY, France)            | 45.7723  | 2.9658   | 14.48 | 2.38  | 8.42   | 1.021 |
| <b>RYO</b> | Ryori (RYO, Japan)                   | 39.0319  | 141.8222 | 18.63 | 2.92  | 9.74   | 1.024 |
| <b>SMO</b> | Samoa (SMO, USA)                     | −14.247  | −170.564 | 1.65  | 0.35  | 0.28   | 1.001 |
| <b>SNB</b> | SONNBLICK (SNB, Austria)             | 12.95778 | 47.05417 | 4.45  | 0.86  | 0.42   | 1.001 |
| <b>SPO</b> | South Pole                           | −89.98   | −24.8    | 1.42  | 0.33  | 0.46   | 1.001 |
| <b>SSL</b> | Schauinsland (SSL, Germany)          | 47.9     | 7.916667 | 25.62 | 4.61  | 17.44  | 1.044 |
| <b>SUI</b> | Suita (SUI, Japan)                   | 34.82    | 135.52   | 37.89 | 6.28  | 15.44  | 1.036 |
| <b>TIK</b> | Tiksi (TIK, Russian Federation)      | 71.5965  | 128.8887 | 4.45  | 0.70  | 1.30   | 1.003 |
| <b>TKY</b> | Takayama (TKY, Japan)                | 36.14617 | 137.4231 | 33.99 | 6.03  | 21.88  | 1.056 |
| <b>TLL</b> | El Tololo (TLL, Chile)               | −30.1683 | −70.8036 | 6.13  | 1.12  | 3.43   | 1.009 |
| <b>TOH</b> | Torfhaus (TOH, Germany)              | 51.8088  | 10.535   | 15.25 | 2.20  | 8.26   | 1.02  |
| <b>WES</b> | Westerland (WES, Germany)            | 54.92314 | 8.308017 | 6.45  | 1.10  | −0.11  | 0.999 |

|                           |                                                                                  |          |          |       |       |        |       |
|---------------------------|----------------------------------------------------------------------------------|----------|----------|-------|-------|--------|-------|
| <b>WSA</b>                | Sable Island (WSA, Canada)                                                       | 43.93227 | −60.0126 | 3.01  | 0.58  | −1.68  | 0.996 |
| <b>YON</b>                | Yonagunijima (YON, Japan)                                                        | 24.4667  | 123.0106 | 3.49  | 0.64  | 0.76   | 1.002 |
| <b>ZEP</b>                | Zeppelin Mountain (ZEP, Norway)                                                  | 78.90669 | 11.88934 | 3.01  | 0.63  | 1.89   | 1.005 |
| <b>ZSF</b>                | Zugspitze-Schneefernerhaus (ZSF, Germany)                                        | 47.4165  | 10.97964 | 22.25 | 3.99  | 14.70  | 1.04  |
| <b>ABP</b>                | Arembepe (ABP, Brazil)                                                           | −12.7667 | −38.1667 | 3.63  | 0.92  | 3.54   | 1.009 |
| <b>AMT<sub>12m</sub></b>  | Argyle, Maine, United States (AMT <sub>12m</sub> )                               | 45.0345  | −68.6821 | 18.21 | 2.32  | −5.16  | 0.986 |
| <b>AMT<sub>30m</sub></b>  | Argyle, Maine, United States (AMT <sub>30m</sub> )                               | 45.0345  | −68.6821 | 13.35 | 1.89  | −3.11  | 0.992 |
| <b>AMT<sub>107m</sub></b> | Argyle, Maine, United States (AMT <sub>107m</sub> )                              | 45.0345  | −68.6821 | 9.46  | 1.54  | −1.35  | 0.996 |
| <b>ASC</b>                | Ascension Island (ASC, United Kingdom of Great Britain and Northern Ireland)     | −7.97    | −14.4    | 1.29  | 0.28  | 0.16   | 1     |
| <b>ASK</b>                | Assekrem (ASK, Algeria)                                                          | 23.26667 | 5.633333 | 1.89  | 0.41  | 1.02   | 1.003 |
| <b>BAL</b>                | Baltic Sea (BAL, Poland)                                                         | 55.5     | 16.67    | 3.54  | 0.74  | 1.54   | 1.004 |
| <b>BGU</b>                | Begur (BGU, Spain)                                                               | 41.97    | 3.23     | 11.33 | 2.80  | 10.87  | 1.028 |
| <b>BME</b>                | St. David's Head (BME, United Kingdom of Great Britain and Northern Ireland)     | 32.37    | −64.65   | 3.59  | 0.74  | 2.01   | 1.003 |
| <b>BMW</b>                | Tudor Hill (Bermuda) (BMW, United Kingdom of Great Britain and Northern Ireland) | 32.27    | −64.88   | 4.21  | 0.80  | −0.44  | 0.999 |
| <b>BSC</b>                | Constanta (Black Sea) (BSC, Romania)                                             | 44.17    | 28.68    | 8.067 | 1.49  | −5.08  | 0.987 |
| <b>CAI</b>                | Cairo (CAI, Egypt)                                                               | 30.08333 | 31.28333 | 52.25 | 12.87 | 36.74  | 0.912 |
| <b>CBA</b>                | Cold Bay (AK) (CBA, United States of America)                                    | 55.2     | −162.717 | 2.44  | 0.49  | 0.22   | 1     |
| <b>CFA</b>                | Cape Ferguson (CFA, Australia)                                                   | −19.2773 | 147.0584 | 2.33  | 0.49  | 1.60   | 0.969 |
| <b>CHM</b>                | Chibougamau (CHM, Canada)                                                        | 49.69251 | −74.3423 | 4.44  | 0.94  | 3.38   | 0.992 |
| <b>CHR</b>                | Christmas Island (CHR, Kiribati)                                                 | 1.7      | −157.17  | 3.98  | 0.66  | −1.24  | 0.853 |
| <b>CRI</b>                | Cape Rama (CRI, India)                                                           | 15.08    | 73.83    | 5.61  | 0.98  | 3.77   | 1.01  |
| <b>CRZ</b>                | Crozet (CRZ, France)                                                             | −46.4333 | 51.83358 | 1.35  | 0.31  | 0.29   | 1.001 |
| <b>CYA</b>                | Casey (CYA, Australia)                                                           | −66.2833 | 110.5167 | 1.31  | 0.30  | 0.28   | 1.001 |
| <b>DMV</b>                | Danum Valley (DMV, Malaysia)                                                     | 4.981389 | 117.8436 | 71.14 | 13.77 | 291.64 | 1.12  |
| <b>DRP</b>                | Drake Passage (DRP, United States of America)                                    | 59.00002 | −64.69   | 10.02 | 2.30  | 7.62   | 1.019 |
| <b>EIC</b>                | Easter Island (EIC, Chile)                                                       | −27.1667 | −109.417 | 1.87  | 0.91  | 0.91   | 1.002 |
| <b>FKL</b>                | Finokalia (FKL, Greece)                                                          | 35.3378  | 25.6694  | 2.89  | 0.65  | 2.20   | 1.005 |
| <b>GMI</b>                | Guam (Mariana Island) (GMI, United States of America)                            | 13.43    | 144.78   | 1.88  | 0.42  | 1.08   | 1.003 |
| <b>GPA</b>                | Gunn Point (GPA, Australia)                                                      | −12.2488 | 131.0453 | 10.42 | 3.31  | 1.40   | 1.021 |
| <b>HBA</b>                | Halley (HBA, United Kingdom of Great Britain and Northern Ireland)               | −75.5715 | −25.5039 | 1.45  | 0.34  | 0.93   | 0.974 |
| <b>HFD</b>                | Heathfield (HFD, United Kingdom of Great Britain and Northern Ireland)           | 50.97667 | 0.230556 | 2.82  | 0.54  | 0.98   | 1.002 |

|                               |                                                         |          |          |       |       |       |       |
|-------------------------------|---------------------------------------------------------|----------|----------|-------|-------|-------|-------|
| <b>HKG</b>                    | Hong Kong, China                                        | 22.2095  | 114.2579 | 36.09 | 7.43  | 29.70 | 1.073 |
| <b>HKO</b>                    | King's Park (HKO,Hong Kong, China)                      | 22.312   | 114.173  | 33.55 | 6.57  | 26.18 | 1.063 |
| <b>HUN</b> <sup>(10 m)</sup>  | Hegyhatsal (HUN <sup>(10 m)</sup> , Hungary)            | 46.95    | 16.65    | 13.13 | 2.07  | −1.92 | 0.994 |
| <b>HUN</b> <sup>(48 m)</sup>  | Hegyhatsal (HUN <sup>(48 m)</sup> , Hungary)            | 46.95    | 16.65    | 8.38  | 1.48  | −1.48 | 0.997 |
| <b>HUN</b> <sup>(82 m)</sup>  | Hegyhatsal (HUN <sup>(82 m)</sup> , Hungary)            | 46.95    | 16.65    | 7.24  | 1.31  | −1.31 | 0.997 |
| <b>HUN</b> <sup>(115 m)</sup> | Hegyhatsal (HUN <sup>(115 m)</sup> , Hungary)           | 46.965   | 16.65    | 6.73  | 1.23  | −1.23 | 0.997 |
| <b>LEF</b> <sup>(396 m)</sup> | Park Falls, Wisconsin, United States (LEF)              | 45.93    | −90.27   | 3.89  | 0.73  | −0.29 | 0.999 |
| <b>ICE</b>                    | Storhofdi (ICE,Iceland)                                 | 63.4     | −20.2833 | 0.97  | 0.57  | 1.39  | 1.003 |
| <b>ISK</b>                    | Issyk-Kul (ISK, Kyrgyzstan)                             | 42.61666 | 76.98333 | 10.99 | 2.43  | 8.89  | 1.023 |
| <b>KCO</b>                    | Kaashidhoo (Male Atoll) (KCO,Maldives)                  | 4.97     | 73.47    | 1.62  | 0.14  | −0.31 | 0.999 |
| <b>KEY</b>                    | Key Biscane (FL) (KEY,United States of America)         | 25.66667 | −80.2    | 7.19  | 1.73  | 6.93  | 1.017 |
| <b>KOT</b>                    | Kotelnyj Island (KOT,Russian Federation)                | 76       | 137.87   | 9.98  | 10.55 | 12.44 | 1.019 |
| <b>KPS</b>                    | K-Puszt (KPS,Hungary)                                   | 46.96667 | 19.58333 | 7.11  | 7.38  | 8.32  | 0.997 |
| <b>KUM</b>                    | Cape Kumukahi (HI) (KUM,United States of America)       | 19.52    | −154.82  | 1.70  | 0.37  | 0.89  | 1.002 |
| <b>KYZ</b>                    | Kyzylcha (KYZ,Uzbekistan)                               | 40.87    | 66.15    | 2.50  | 6.99  | 7.12  | 1.016 |
| <b>KZD</b>                    | Sary Taukum (KZD,Kazakhstan)                            | 44.45    | 77.57    | 8.84  | 2.15  | 8.28  | 1.021 |
| <b>KZM</b>                    | Plateau Assy (KZM,Kazakhstan)                           | 43.25    | 77.88    | 11.60 | 2.93  | 11.19 | 1.029 |
| <b>LEF</b>                    | Park Falls (WI) (LEF,United States of America)          | 45.93    | −90.27   | 6.94  | 1.95  | 3.93  | 1.021 |
| <b>LLN</b>                    | Lulin (LLN,Taiwan, Province of China)                   | 23.47    | 120.87   | 29.67 | 7.35  | 29.07 | 1.073 |
| <b>LPO</b>                    | Ile Grande (LPO,France)                                 | 48.8036  | −3.5839  | 3.97  | 0.93  | 3.48  | 1.009 |
| <b>MAA</b>                    | Mawson (MAA,Australia)                                  | −67.6047 | 62.87056 | 1.27  | 0.29  | 0.18  | 1     |
| <b>MDN</b>                    | Madonie - Piano Battaglia (MDN,Italy)                   | 37.88031 | 14.02564 | 12.39 | 2.97  | 11.27 | 1.028 |
| <b>MID</b>                    | Sand Island (MID,United States of America)              | 28.22    | −177.37  | 1.95  | 0.41  | 1.01  | 1.003 |
| <b>MKN</b>                    | Mt. Kenya (MKN,Kenya)                                   | −0.0622  | 37.2972  | 8.62  | 2.14  | 8.17  | 1.021 |
| <b>NAT</b>                    | Natal (NAT,Brazil)                                      | −6       | −35.2    | 1.64  | 0.33  | 1.04  | 1.003 |
| <b>NMB</b>                    | Gobabeb (NMB,Namibia)                                   | −23.57   | 15.03    | 1.19  | 0.24  | −0.51 | 0.999 |
| <b>NWR</b>                    | Niwot Ridge - T-van (CO) (NWR,United States of America) | 40.05    | −105.59  | 17.63 | 4.19  | 16.50 | 1.042 |
| <b>OXK</b>                    | Ochsenkopf (OXK,Germany)                                | 50.0301  | 11.8084  | 10.38 | 2.42  | 9.58  | 1.024 |
| <b>PDM</b>                    | Pic du Midi (PDM,France)                                | 42.9372  | 0.1411   | 13.17 | 3.27  | 12.57 | 1.033 |
| <b>PSA</b>                    | Palmer Station (PSA,United States of America)           | −64.7743 | −64.0544 | 1.32  | 0.30  | 0.27  | 1.001 |
| <b>PTA</b>                    | Point Arena (CA) (PTA,United States of America)         | 38.95    | −123.73  | 7.03  | 1.54  | 5.68  | 1.015 |

|                              |                                                                                                       |          |          |       |      |       |       |
|------------------------------|-------------------------------------------------------------------------------------------------------|----------|----------|-------|------|-------|-------|
| <b>RGL<sub>(45 m)</sub></b>  | Ridge Hill (RGL,United Kingdom of Great Britain and Northern Ireland)                                 | 51.99756 | −2.54003 | 3.50  | 0.61 | −1.54 | 0.996 |
| <b>RGL<sub>(90 m)</sub></b>  | Ridge Hill (RGL,United Kingdom of Great Britain and Northern Ireland)                                 | 51.99756 | −2.54003 | 3.39  | 0.59 | −1.44 | 0.996 |
| <b>RPB</b>                   | Ragged Point (RPB,Barbados)                                                                           | 13.17    | −59.43   | 1.83  | 0.39 | 1.13  | 1.003 |
| <b>SDZ</b>                   | Shangdianzi (SDZ,China)                                                                               | 40.65    | 117.1166 | 23.06 | 5.41 | 21.55 | 1.053 |
| <b>SEY</b>                   | Mahé (SEY,Seychelles)                                                                                 | −4.67    | 55.17    | 1.92  | 0.51 | 1.92  | 1.001 |
| <b>SGP</b>                   | Southern Great Plains E13 (OK) (SGP,United States of America)                                         | 36.6     | −97.5    | 13.75 | 3.61 | 13.75 | 1.02  |
| <b>SHM</b>                   | Shemya Island (SHM,United States of America)                                                          | 52.72    | 174.1    | 2.66  | 0.51 | 0.87  | 1.002 |
| <b>STM</b>                   | Ocean Station M (STM,Norway)                                                                          | 66       | 2        | 2.34  | 0.53 | 1.98  | 1.005 |
| <b>SUM</b>                   | Summit (SUM,Denmark)                                                                                  | 72.58    | −38.48   | 1.95  | 0.43 | 1.03  | 1.003 |
| <b>SYO</b>                   | Syowa (SYO,Japan)                                                                                     | −69.0053 | 39.5811  | 1.36  | 0.31 | 0.44  | 1.001 |
| <b>TAC<sub>(54 m)</sub></b>  | Tacolneston Tall Tower (TAC <sub>(54 m)</sub> ,United Kingdom of Great Britain and Northern Ireland)  | 52.5177  | 1.1386   | 3.95  | 0.70 | −1.59 | 0.996 |
| <b>TAC<sub>(100 m)</sub></b> | Tacolneston Tall Tower (TAC <sub>(100 m)</sub> ,United Kingdom of Great Britain and Northern Ireland) | 52.5177  | 1.1386   | 9.20  | 1.81 | −0.97 | 0.997 |
| <b>TAC<sub>(185 m)</sub></b> | Tacolneston Tall Tower (TAC <sub>(185 m)</sub> ,United Kingdom of Great Britain and Northern Ireland) | 52.5177  | 1.1386   | 2.99  | 0.54 | −0.27 | 0.999 |
| <b>TAP</b>                   | Tae-ahn Peninsula (TAP,Republic of Korea)                                                             | 36.73    | 126.13   | 17.45 | 4.17 | 16.75 | 1.042 |
| <b>TER</b>                   | Teriberka (TER,Russian Federation)                                                                    | 69.2     | 35.1     | 2.62  | 0.54 | 1.10  | 1.003 |
| <b>THD</b>                   | Trinidad Head (CA) (THD,United States of America)                                                     | 41.0541  | −124.151 | 8.27  | 1.79 | 6.98  | 1.018 |
| <b>USH</b>                   | Ushuaia (USH,Argentina)                                                                               | −54.8485 | −68.3107 | 1.49  | 0.34 | 0.72  | 1.002 |
| <b>UTA</b>                   | Wendover (UT) (UTA,United States of America)                                                          | 39.9     | −113.72  | 3.09  | 0.65 | 2.46  | 1.006 |
| <b>UUM</b>                   | Ulaan Uul (UUM,Mongolia)                                                                              | 44.444   | 111.0861 | 5.55  | 1.16 | 4.34  | 1.011 |
| <b>WIS</b>                   | Sede Boker (WIS,Israel)                                                                               | 31.13    | 34.88    | 6.47  | 1.55 | 6.09  | 1.015 |
| <b>WLG</b>                   | Mt. Waliguan (WLG,China)                                                                              | 36.2875  | 100.8963 | 5.52  | 1.13 | 4.59  | 1.011 |
| <b>WBI<sub>31m</sub></b>     | West Branch, Iowa, United States (WBI <sub>31m</sub> )                                                | 41.7248  | −91.3529 | 10.11 | 1.75 | −3.46 | 0.992 |
| <b>WBI<sub>99m</sub></b>     | West Branch, Iowa, United States (WBI <sub>99m</sub> )                                                | 41.7248  | −91.3529 | 7.79  | 1.40 | −2.23 | 0.994 |
| <b>WBI<sub>379m</sub></b>    | West Branch, Iowa, United States (WBI <sub>379m</sub> )                                               | 41.7248  | −91.3529 | 6.54  | 1.19 | −0.74 | 0.997 |
| <b>WKT<sub>9m</sub></b>      | Moody, Texas, United States (WKT <sub>9m</sub> )                                                      | 31.3149  | −97.3269 | 16.39 | 2.86 | 6.15  | 1.015 |

|                           |                                                                    |         |          |       |      |      |       |
|---------------------------|--------------------------------------------------------------------|---------|----------|-------|------|------|-------|
| <b>WKT<sub>30m</sub></b>  | Moody, Texas, United States (WKT <sub>30m</sub> )                  | 31.3149 | −97.3269 | 12.73 | 2.41 | 5.77 | 1.015 |
| <b>WKT<sub>61m</sub></b>  | Moody, Texas, United States (WKT <sub>61m</sub> )                  | 31.3149 | −97.3269 | 10.82 | 2.07 | 3.16 | 1.008 |
| <b>WKT<sub>122m</sub></b> | Moody, Texas, United States (WKT <sub>122m</sub> )                 | 31.3149 | −97.3269 | 8.63  | 1.73 | 1.61 | 1.004 |
| <b>WKT<sub>244m</sub></b> | Moody, Texas, United States (WKT <sub>244m</sub> )                 | 31.3149 | −97.3269 | 7.58  | 1.55 | 3.46 | 1.009 |
| <b>WKT<sub>457m</sub></b> | Moody, Texas, United States (WKT <sub>457m</sub> )                 | 31.3149 | −97.3269 | 6.57  | 1.34 | 2.83 | 1.007 |
| <b>SCT<sub>31m</sub></b>  | Beech Island, South Carolina, United States (SCT <sub>31m</sub> )  | 33.4057 | −81.8334 | 13.99 | 2.21 | 7.21 | 1.017 |
| <b>SCT<sub>61m</sub></b>  | Beech Island, South Carolina, United States (SCT <sub>61m</sub> )  | 33.4057 | −81.8334 | 10.71 | 1.82 | 6.03 | 1.014 |
| <b>SCT<sub>305m</sub></b> | Beech Island, South Carolina, United States (SCT <sub>305m</sub> ) | 33.4057 | −81.8334 | 5.99  | 1.09 | 3.37 | 1.008 |
